# Supplementary figures and images for: Estimating dispersal rates and locating genetic ancestors with genome-wide genealogies
Source: eLife journal article supplement (doi:10.7554/elife.72177), 2024-11-26

individual loci

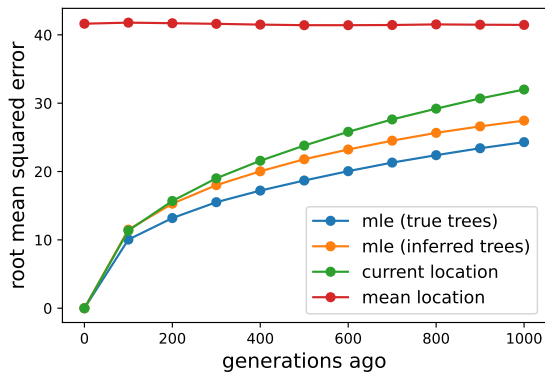

mean across loci

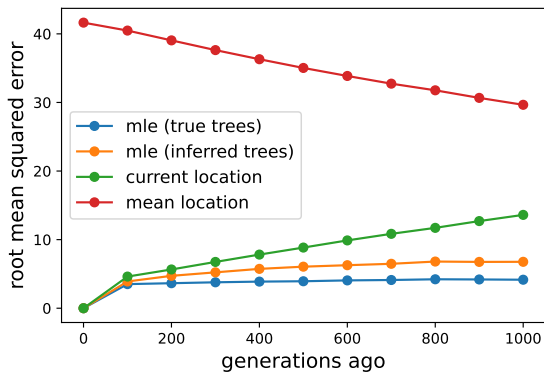

MLE

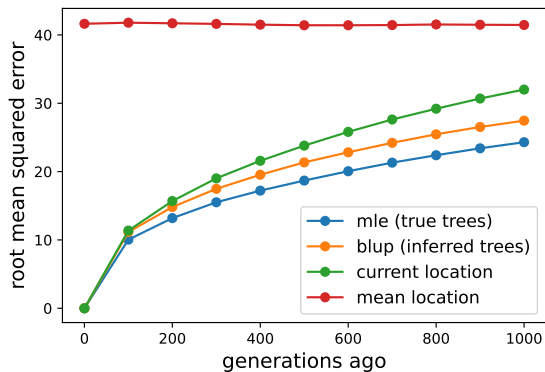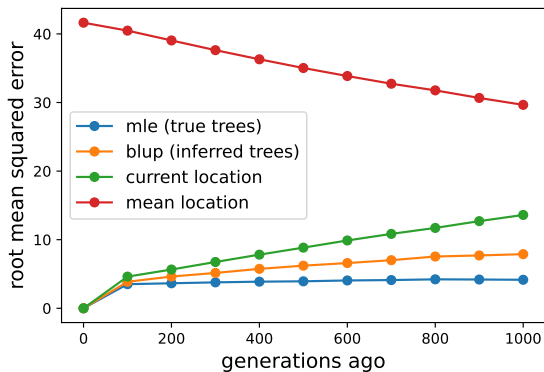

BLUP

Supplement: supp [file elife-72177-supp-v1.zip]

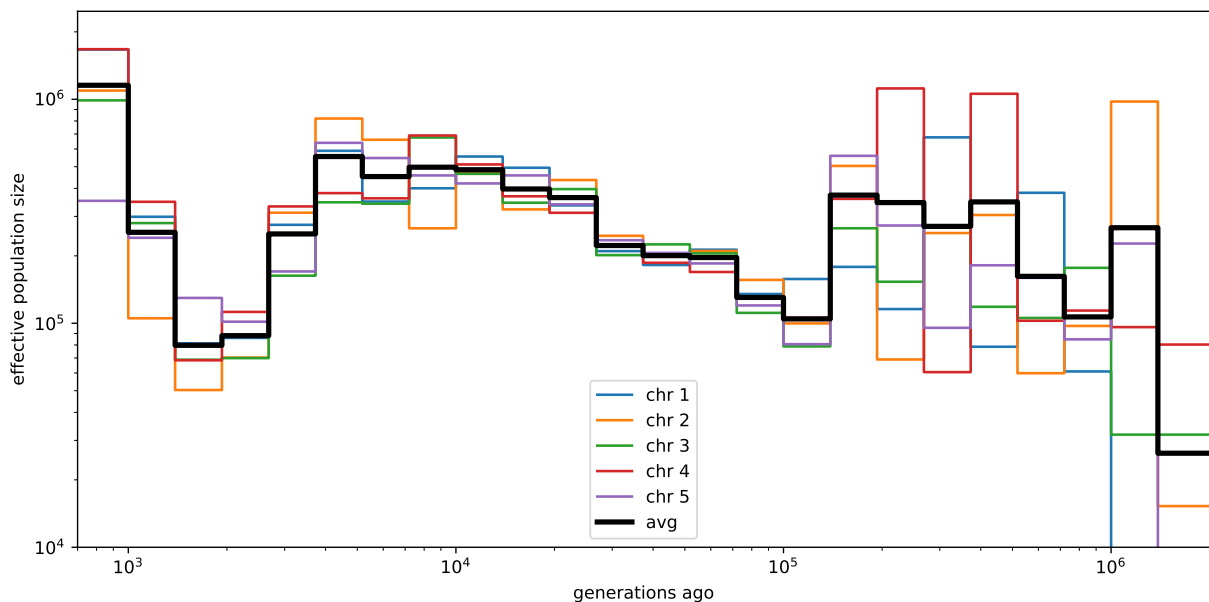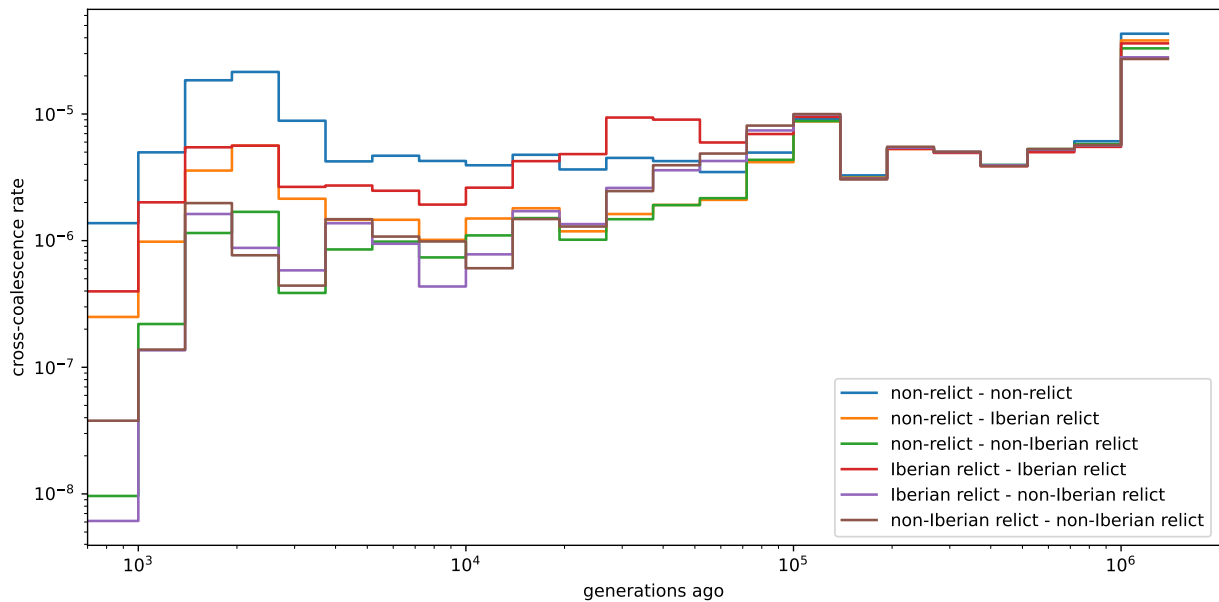

Supplement: supp [file elife-72177-supp-v1.zip]

individual loci

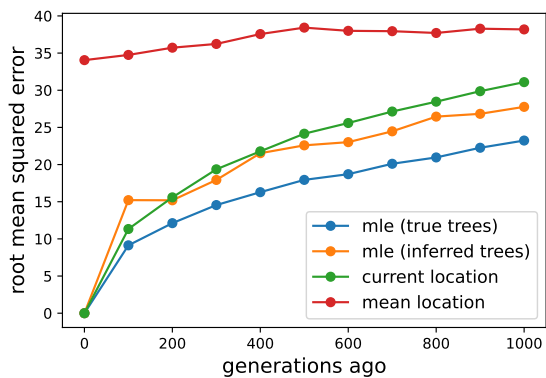

mean across loci

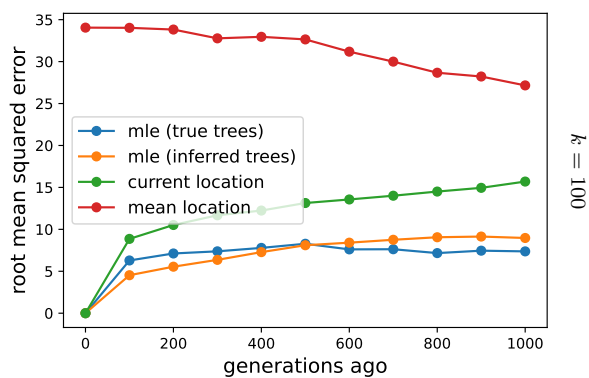 $k = 100$ 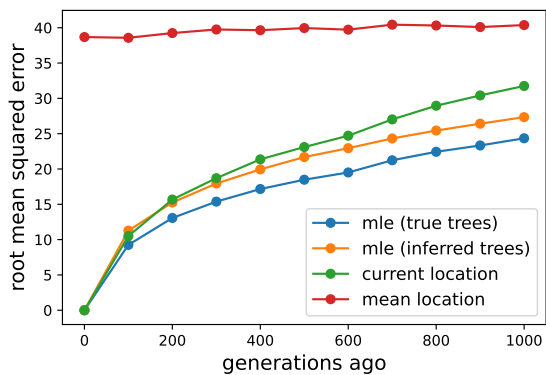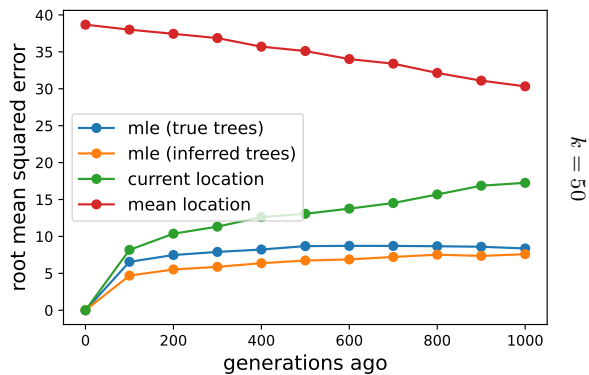 $k = 50$ 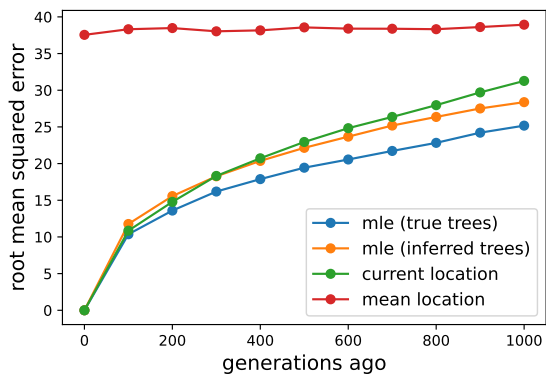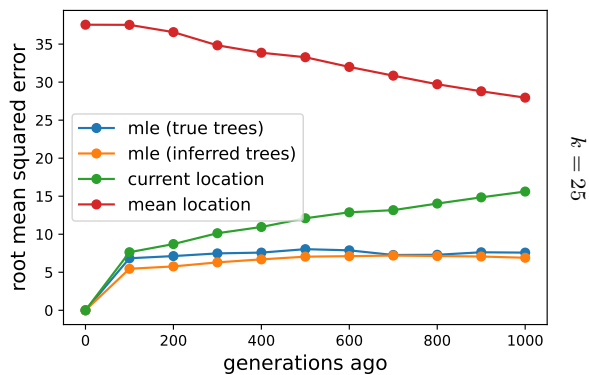 $k = 25$

Supplement: supp [file elife-72177-supp-v1.zip]

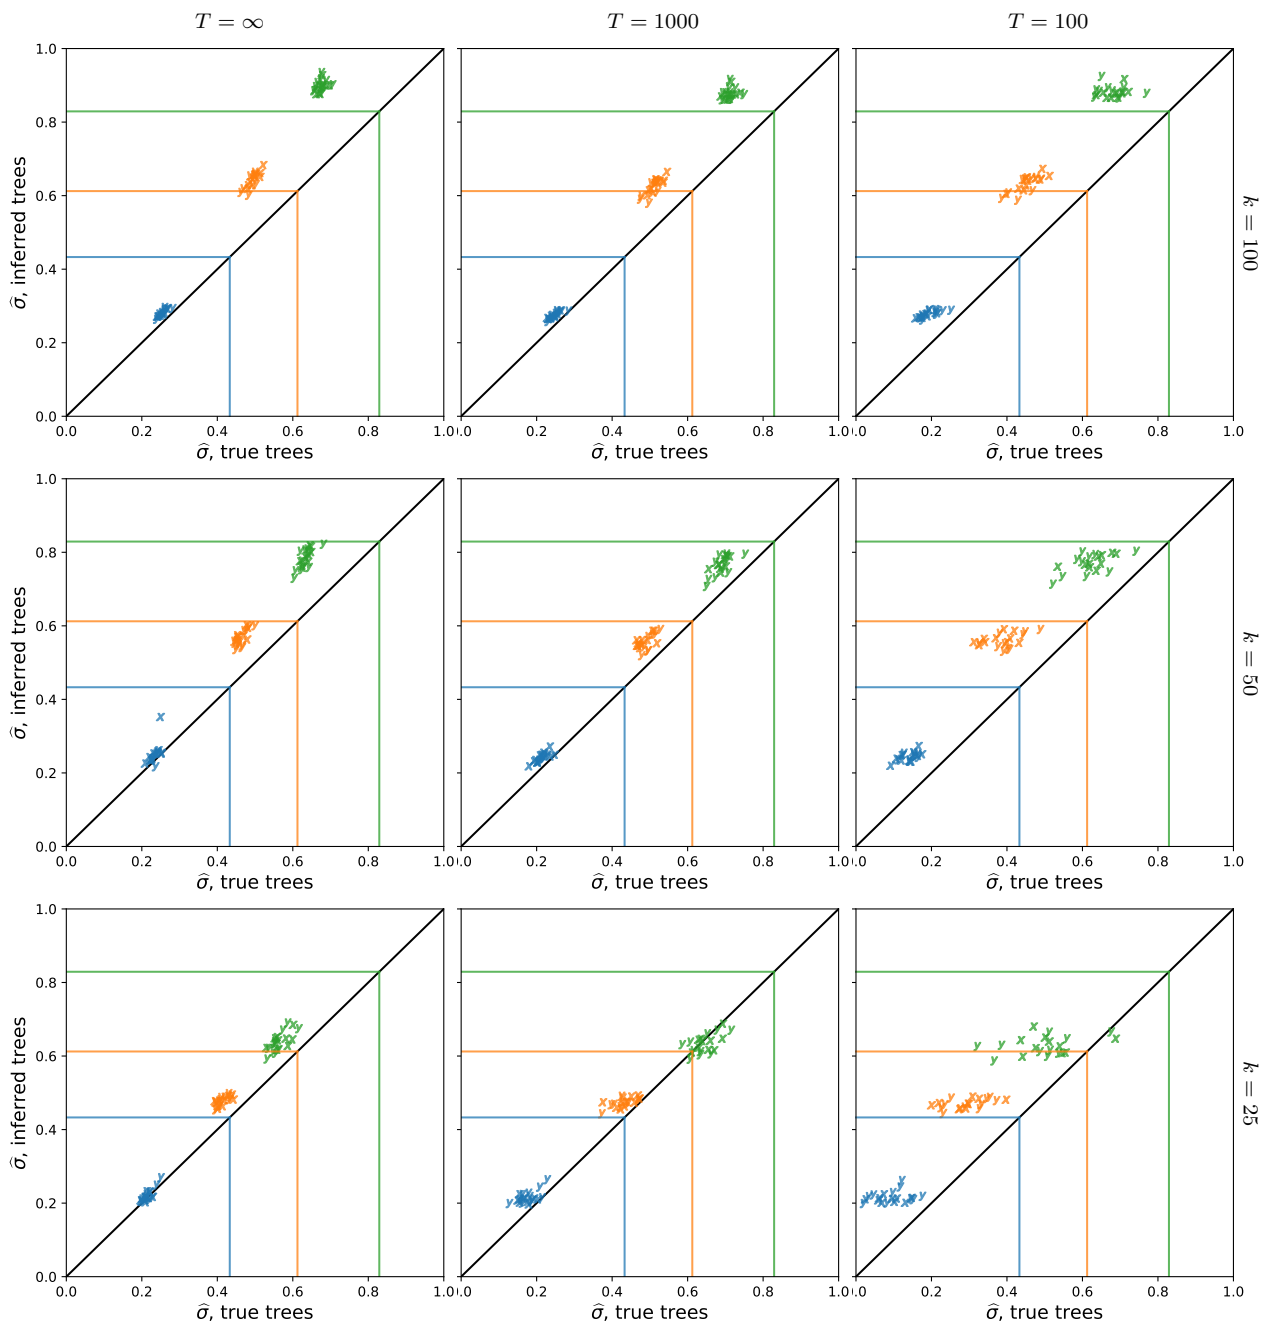

Supplement: supp [file elife-72177-supp-v1.zip]

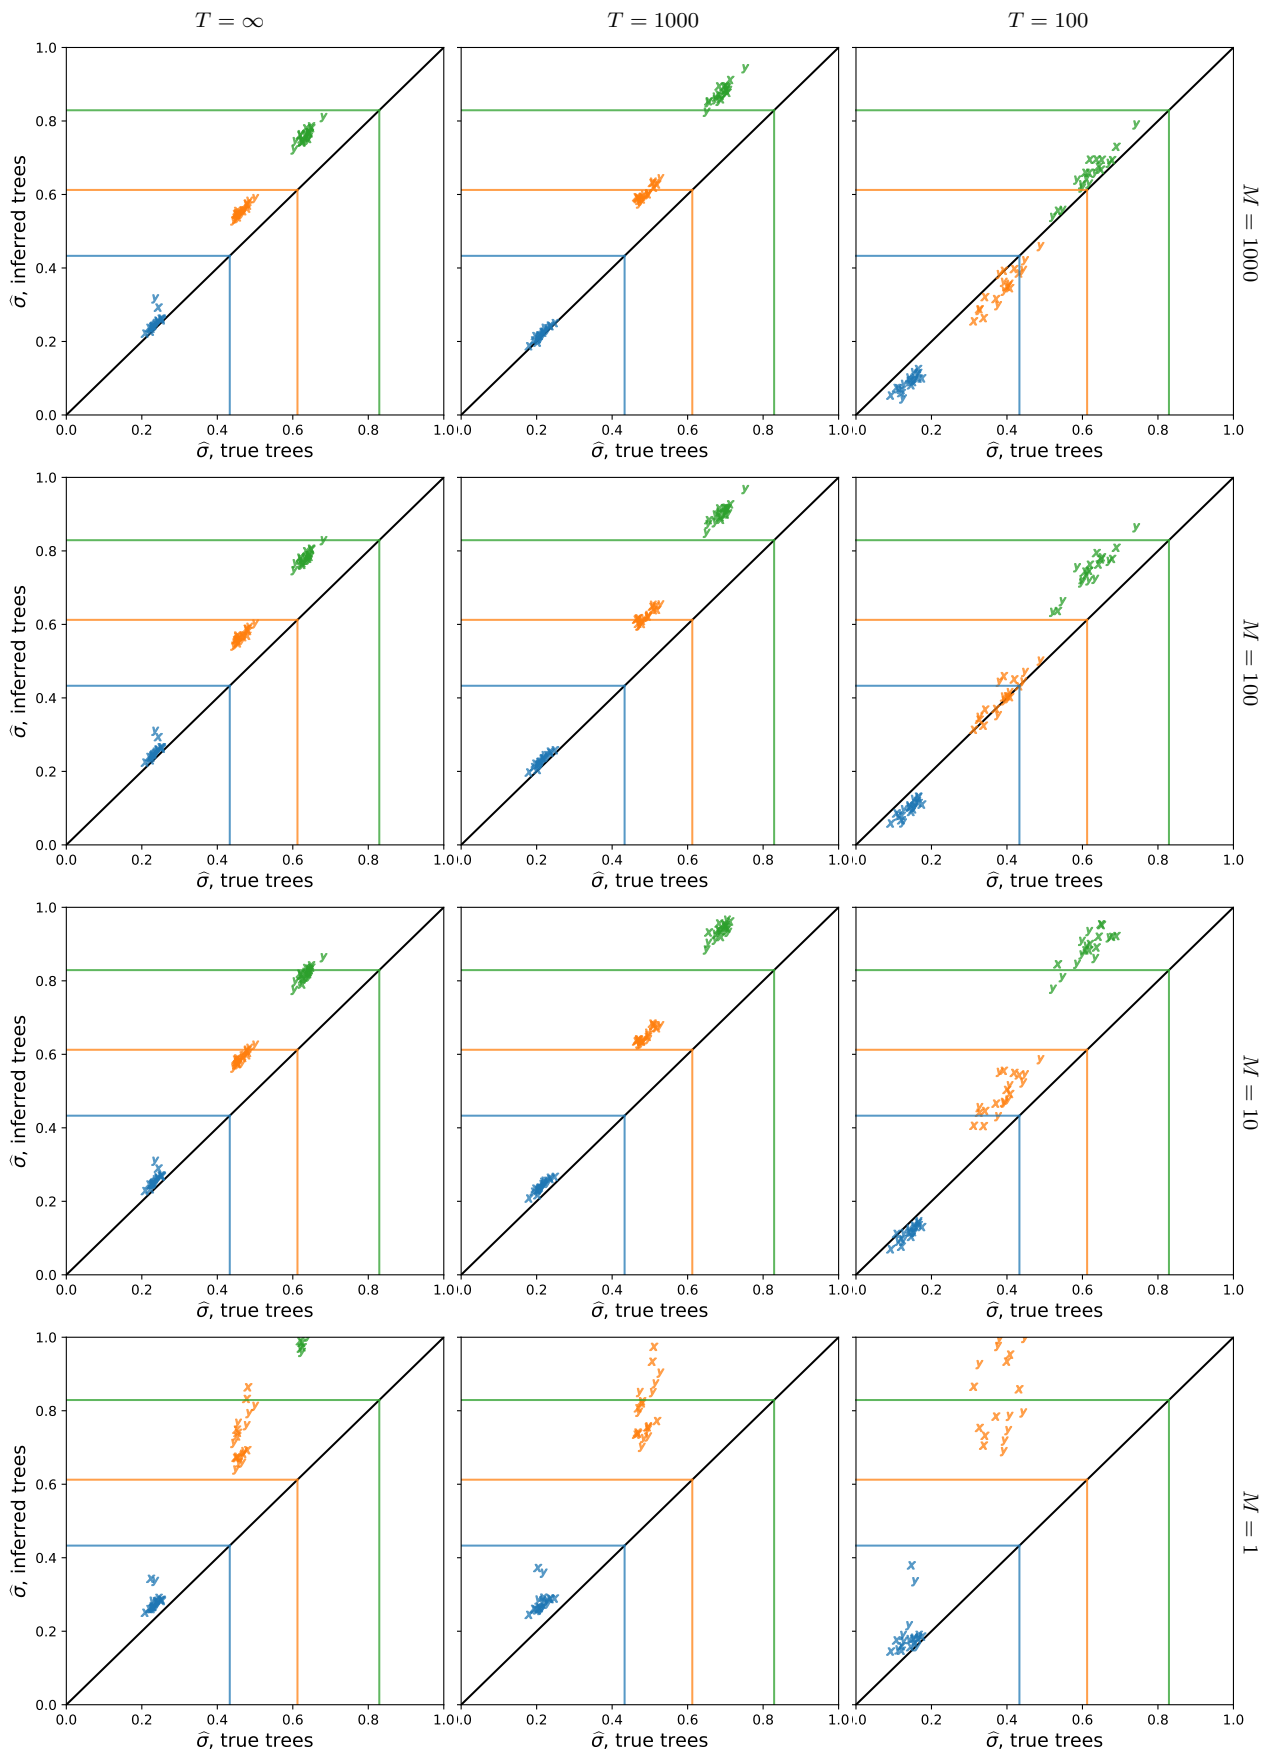

Supplement: supp [file elife-72177-supp-v1.zip]

individual loci

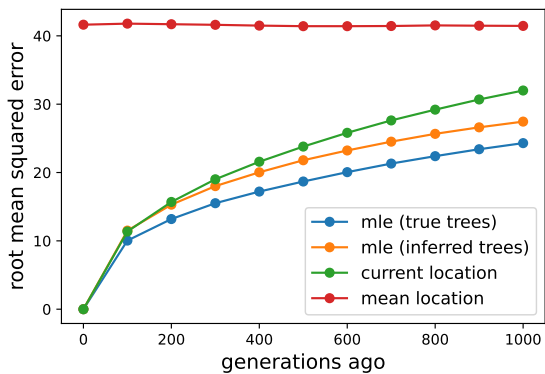

mean across loci

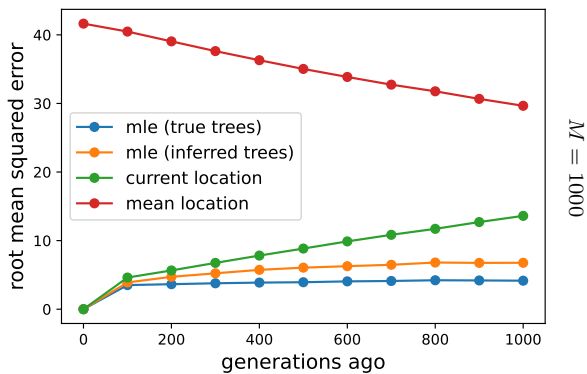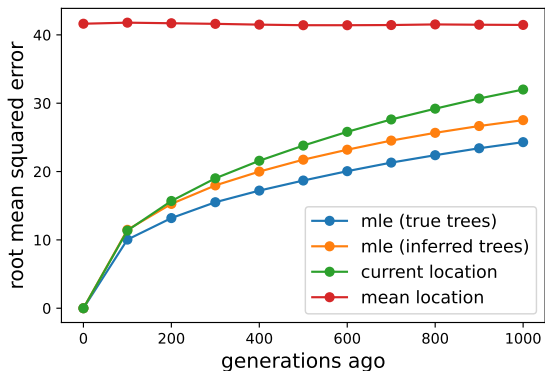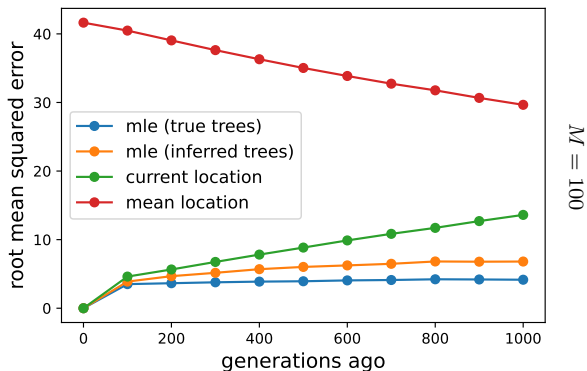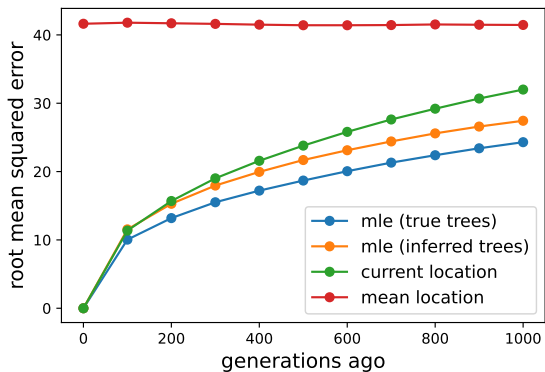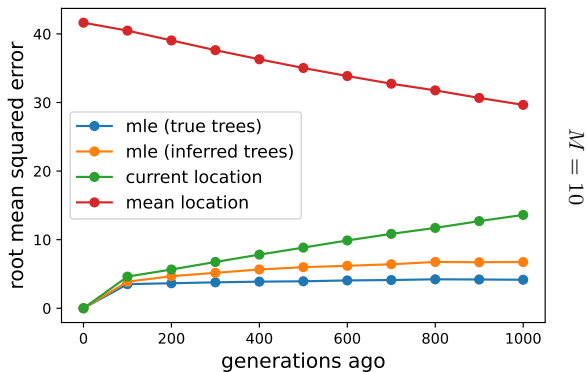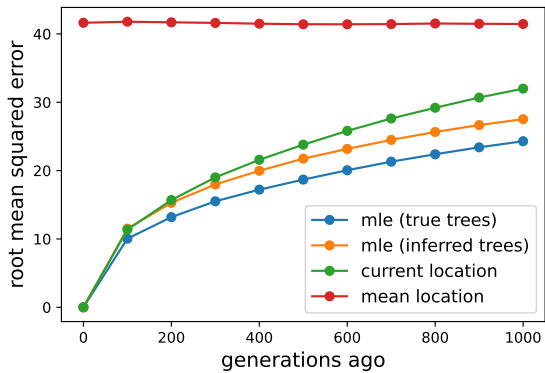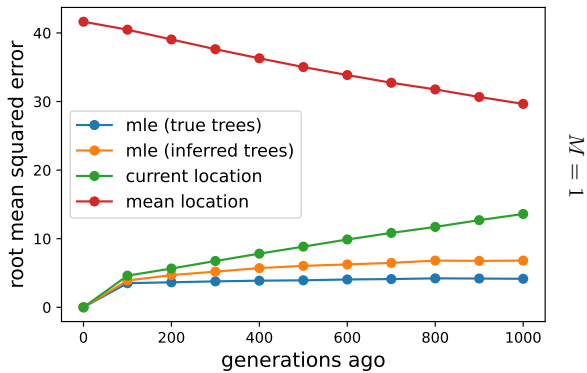

Supplement: supp [file elife-72177-supp-v1.zip]
